# Supplementary material for: Metabolic Engineering of Saccharomyces cerevisiae for Efficient Retinol Synthesis
Source: MDPI journal article supplement (doi:10.3390/jof9050512), 2023-04-26
Supplement: s1 [file s1]

## Supplementary Materials

**Table S1. Plasmids used in this study**

| Plasmids       | Characteristics                   | Reference  |
|----------------|-----------------------------------|------------|
| PY13-crtE      | PY13 derivate, PGAL7-crtE         | This study |
| PY14-crtI      | PY14 derivate, PGAL7-crtI         | This study |
| PY15-crtB      | PY15 derivate, PGAL7-crtB         | This study |
| PY13-crtYB     | PY13 derivate, PGAL7-crtYB        | This study |
| PY14-blh       | PY14 derivate, PGAL7-blh          | This study |
| PY15-blh-blh   | PY15 derivate, blh-PGAL1,10-blh   | This study |
| PY13-crtE-crtI | PY13 derivate, crtI-PGAL1,10-crtE | This study |
| PY13-ERG9      | PY13 derivate, PHXT1-ERG9         | This study |
| PY15-ERG9      | PY15 derivate, PERG1-ERG9         | This study |
| PY14-ERG9      | PY14 derivate, PHXT1-ERG9-CLN2    | This study |
| PY26-POS5      | PY26 derivate, PGAL7-POS5         | This study |
| PY13-CYC2      | PY13 derivate, PGAL7-CYC2         | This study |
| PY13-FOX2      | PY13 derivate, PGAL7-FOX2         | This study |
| PY13-ENV9      | PY13 derivate, PGAL7-ENV9         | This study |
| PY13-IFA38     | PY13 derivate, PGAL7-IFA38        | This study |
| PY13-ybbo      | PY13 derivate, PGAL7-ybbo         | This study |
| PY15-PAH1      | PY15 derivate, PTEF1-PAH1         | This study |
| PY15-LRO1      | PY15 derivate, PTEF1-LRO1         | This study |
